# 1 The methyl cycle is a conserved regulator of biological clocks

2

3 Jean-Michel Fustin<sup>1\*†</sup>, Shiqi Ye<sup>1†</sup>, Christin Rakers<sup>2</sup>, Marijke Versteven<sup>3</sup>, Samantha J.  
4 Cargill<sup>4</sup>, T. Katherine Tamai<sup>5</sup>, Yao Xu<sup>6</sup>, Maria Luísa Jabbur<sup>6</sup>, Rika Kojima<sup>7</sup>, Melisa  
5 L. Lamberti<sup>8</sup>, Kumiko Yoshioka-Kobayashi<sup>9</sup>, David Whitmore<sup>10</sup>, Ryoichiro  
6 Kageyama<sup>9</sup>, Takuya Matsuo<sup>11</sup>, Ralf Stanewsky<sup>3</sup>, Diego A. Golombek<sup>8</sup>, Carl Hirschie  
7 Johnson<sup>6</sup>, Gerben van Ooijen<sup>4</sup>, Hitoshi Okamura<sup>12\*</sup>.

8

9 1 Graduate School of Pharmaceutical Sciences, Laboratory of Molecular Metabolism,  
10 Kyoto University, Japan. Tel: +81-75-753-9254

11 2 Graduate School of Pharmaceutical Sciences, Kyoto University, Japan

12 3 Institute of Neuro- and Behavioral Biology, University of Münster,

13 Münster

14 4 School of Biological Sciences, University of Edinburgh, United Kingdom

15 5 Institute of Transformative Bio-Molecules (WPI-ITbM), Nagoya University,

16 Nagoya, Japan

17 6 Department of Biological Sciences, Vanderbilt University, Nashville, USA

18 7 Karolinska Institute, Sweden

19 8 Department of Science and Technology, National University of

20 Quilmes/CONICET, Buenos Aires, Argentina

21 9 Institute for Frontier Life and Medical Sciences, Kyoto University, Kyoto, Japan

22 10 Centre for Cell and Molecular Dynamics, Department of Cell and Developmental

23 Biology, University College London, United Kingdom

24 11 Center for Gene Research, Nagoya University, Nagoya, Japan

12 Graduate School of Pharmaceutical Sciences, Molecular Brain Science, Kyoto  
University, Kyoto, Japan.

† These authors contributed equally to this work

\*Corresponding authors: j.m.fustin@pharm.kyoto-u.ac.jp and  
okamurah@pharm.kyoto-u.ac.jp

## Abstract

The methyl cycle is a universally conserved metabolic pathway operating in prokaryotes and eukaryotes. In this pathway, the amino acid methionine is used to synthesize S-adenosylmethionine, the methyl donor co-substrate in the methylation of nucleic acids, histone and non-histone proteins and many other molecules within the cell. The methylation of nucleic acids and proteins is the foundation of epigenetic and epitranscriptomic regulations of gene expression, but whether the methyl cycle centrally regulates gene expression and function by controlling the availability of methyl moieties is poorly understood.

From cyanobacteria to humans, a circadian clock that involves an exquisitely regulated transcription-translation-feedback loop driving oscillations in gene expression and orchestrating physiology and behavior has been described. We reported previously that inhibition of the methyl cycle in mammalian cells caused the lengthening of the period of these oscillations, suggesting the methyl cycle may indeed act as a central regulator of gene expression, at least in mammals. Here, we investigated whether the methyl cycle, given its universal presence among living beings, regulates the circadian clock in species across the phylogenetic tree of life.

We reveal a remarkable evolutionary conservation of the link between the methyl cycle and the circadian clock. Moreover, we show that the methyl cycle also regulates the somite segmentation clock, another transcription-translation negative feedback loop-based timing mechanism that orchestrate embryonic development in vertebrates, highlighting the methyl cycle as a master regulator of biological clocks.

## SIGNIFICANCE STATEMENT

Here we reveal that the methyl cycle, a universal metabolic pathway leading to the synthesis of S-adenosylmethionine, the methyl donor co-substrate in virtually all transmethylation reactions within the cell, is a conserved regulator of biological clocks. These discoveries highlight the methyl cycle as a metabolic hub that regulates gene expression via the availability of methyl moieties for the methylation of nucleic acids, proteins and many other molecules with the cell.

## INTRODUCTION

Methylation reactions start with the metabolization of methionine into S-adenosylmethionine, or SAM: the universal methyl donor co-substrate in the transmethylation of nucleic acids, proteins, carbohydrates, phospholipids and small molecules. During the methylation process, SAM is converted into adenosylhomocysteine (SAH) that is rapidly hydrolysed into homocysteine to prevent competitive inhibition of methyltransferase enzymes by SAH due to its close structural relatedness to SAM. Homocysteine is detrimental to physiology (1), and is recycled back into methionine or used for glutathione synthesis via cysteine and cystathionine in the trans-sulfuration pathway. The ratio SAM/SAH is known as the methylation potential: a measure of the tendency to methylate biomolecules (2-4). In

plants, fungi, prokaryotes and other microorganisms, the methyl cycle is used both as a source of SAM, as well as a source of *de novo* methionine synthesis for growth. In a wide variety of eukaryotes, however, methionine is an essential amino acid that must be obtained from food, especially in periods of growth, the methyl cycle in these organisms ensuring only the flow of one-carbon units to SAM.

Three enzymatic activities are required to keep the methyl cycle running. 5-methyltetrahydrofolate or betaine are used as a source of methyl moieties to regenerate methionine (Met) from homocysteine (Hcy). The enzyme *Methyltetrahydrofolate-homocysteine S-methyltransferase* is universal but *Betaine-homocysteine methyltransferase* is present only in some vertebrate tissues, mainly in the liver. Likewise, *Adenosylmethionine synthetase* (SAM synthesis from Met) and *adenosylhomocysteinase* (Hcy synthesis from SAH) are virtually universal. There is considerable divergence in methyltransferases (MTases), and the phylogeny of five structural classes of MTases is unclear. The oldest MTases represents the RNA methyltransferases, appearing in the early forms of life evolving on Earth in an RNA World (5). Methyl cycle metabolites are thought to have been present in the prebiotic world, since methionine can be created by a spark discharge and is proposed to be an intermediate in the prebiotic synthesis of homocysteine, which was also found among organic molecules synthesized in the 1972 Miller experiment (6). Prebiotic chemistry might have involved methylation by reaction with formaldehyde, an abundant prebiotic organic molecule, to prime the evolution of biological methylation reactions (7).

Similarly, an endogenous circadian clock evolved to anticipate the daily cycles of light and darkness has been found in many organisms, from cyanobacteria to humans.

Transcription-translation feedback loops (TTFLs) of “clock genes” directly or indirectly regulating their own transcription underlie many functions of the clock, and drive oscillations of output genes controlling physiology and behavior. Some molecular components of the clock are remarkably conserved in metazoan, notably the genes *Clock* and *Period*, coding for transcription factors, with *Clock* activating the transcription of *Per* and *Per* inhibiting its own transcription.

In 2013, we reported that disruption of the methyl cycle by inhibitors of *Adenosylhomocysteinase* (AHCY), causing an accumulation of SAH known to lead to a general inhibition of transmethyations, strongly affected the circadian clock in mouse and human cells (8). We now show that the link between the methyl cycle and the circadian clock we first uncovered in mammals has been conserved during more than 2.5 billion years of evolution. We further reveal a similar link between the methyl cycle and another TTFL called the somite segmentation clock that underlies the development of early body plan in vertebrates, indicating that the methyl cycle is a key regulator of biological clocks.

## RESULTS

### AHCY is a remarkably conserved key enzyme in the methyl cycle

The use of carbocyclic adenosine analogues such as Deazaneplanocin A (DZnep) as inhibitors of AHCY was established more than 30 years ago (9-11). The reaction catalyzed by AHCY is the cleavage of SAH to adenosine and L-homocysteine, DZnep inhibiting this reaction by occupying the adenosine binding site. The crystal structure of human (14), mouse (15) and yellow lupin (*Lupinus luteus*) (16) AHCY complexed with adenosine or analogues have been described, and insights into its

catalytic activity have been obtained (17-20). AHCY has been reported to be one of the most evolutionarily conserved proteins (21), but experimentally-determined structures of AHCY with DZnep remain to be described for most organisms investigated here. A full-length multiple sequence alignment (Fig. S1) and homology modelling of AHCY from human to cyanobacteria (Fig. 1a and Movie S1) revealed high sequence and predicted tertiary structure conservation. Amino acids contributing to the DZnep binding site showed at least 88% identity between all eukaryotic AHCY sequences, and 78% between human and bacterial sequences, resulting in the DZnep binding site to be virtually identical in all organisms investigated (Fig. 1b, c and Fig. S2). Moreover, amino acids that were reported as crucial for the activity of rat AHCY (His55, Asp130, Glu155, Lys186, Asp190, and Asn191 (20)) are perfectly conserved (Fig. S1). In line with the above, molecular docking simulations of AHCY with adenosine or DZnep revealed comparable ligand binding conformations and estimated binding free energies for all organisms (Fig. 1d and S2). Together these observations strongly support the use of DZnep as a valid approach to test the effects of methyl cycle inhibition on clocks across phyla.

## **The circadian clock and methyl cycle are linked in vertebrates.**

We first tested the effects of DZnep on the mammalian clock, in a human osteosarcoma cell line stably transfected with a luciferase reporter vector for the core clock gene *Bmal1* (22) and in mouse embryonic fibroblasts from PER2::LUC knock-in mice expressing a fusion between the endogenous core clock protein PER2 and LUCIFERASE (23). These cells are the gold standard for measuring circadian parameters *in vitro* since they allow the oscillating expression of the genes *Bmal1* or *Per2* to be followed in real-time. In human (Fig. 2a) and mouse (Fig. 2b) cells, DZnep

dose-dependently increased the period, up to a maximum of ~40 hours and ~30 hours, respectively, with 100  $\mu$ M DZnep.

We next tested DZnep on a non-mammalian cell type commonly used for circadian studies, the zebrafish embryonic PAC2 cell line and revealed a potent effect of the drug both on circadian period and amplitude (Fig. 2c), as in mammals. Since the circadian clock in these cells is directly light-sensitive and can be entrained by light-dark cycles, we also tested whether the entrainment of the cells to light was affected by DZnep before release into constant darkness (DD). Indeed, a strong effect on entrainment was observed (Fig. 2c). The gene *Per1b* normally peaks at dawn but was severely blunted and delayed in DZnep-treated cells, even at the lowest concentration of DZnep. In DD, period lengthened dramatically to a peak value of over 40 hours at 10  $\mu$ M, that was slightly lower at 100  $\mu$ M. To conclude, period and amplitude of circadian oscillations of clock gene expression are strongly affected by DZnep in all three vertebrate cell systems.

### **The circadian clock and methyl cycle are linked in invertebrates.**

As models for invertebrates, we selected the fruit fly *Drosophila melanogaster* and the nematode *Caenorhabditis elegans*. Flies have been instrumental in molecular circadian biology, allowing the 2017 Nobel laureates and their co-workers to establish the canonical TTFL model underlying circadian oscillations in metazoan (24-26).

In contrast, *C. elegans* is a relatively new model in circadian biology, the general principles governing its circadian clock remaining largely unidentified (27, 28). Circadian oscillations in the expression of the *sur-5* gene were described a few years ago and used for the real-time monitoring of the nematode's circadian molecular rhythms by luciferase reporter (29).

As observed in vertebrates, DZnep caused dose-dependent period lengthening in *D. melanogaster* haltere cultures from transgenic luciferase reporter TIM-LUC flies (Fig. 3a), and a significant effect of 100  $\mu$ M DZnep was also observed in freely moving nematodes. Period changes in flies were of lesser magnitude than observed in vertebrates. Nevertheless, these results indicate that the link between the circadian clock and the methyl cycle is conserved in invertebrates.

### **The circadian clock and methyl cycle are linked in plants and algae.**

Fig. 1 and S1 show that a plant- and green algae-specific region exists in AHCY, from amino acids 151 to 191, which is involved in the interaction of AHCY with adenosine kinase and cap methyltransferase, and required for nuclear targeting of the enzyme (30, 31). Despite this insertion, however, the domains for SAH and NAD<sup>+</sup> binding are remarkably conserved.

The most commonly used model organism to study circadian rhythms in land plants is *Arabidopsis thaliana*. We thus tested the effects of DZnep on luminescent rhythms reporting the expression of the plant evening gene TOC1 in protoplasts (Fig. 4a), and extended our investigations to aquatic unicellular green algae (Fig. 4b and c). *Ostreococcus tauri* and *Chlamydomonas reinhardtii* represent two different classes of unicellular green algae that have been successfully used in circadian studies and constitute great models to investigate cell-autonomous metabolic processes (32-36). We tested increasing concentration of DZnep on *Arabidopsis* and algal cell types and observed an increase in period length and a decrease in amplitude almost identical to the results obtained in vertebrates. In conclusion, the effects of DZnep treatment on transcriptional rhythms are also conserved in the plant kingdom. These results are



especially significant given unicellular algae and humans are separated by more than 1 billion years of evolution.

# **The circadian clock and methyl cycle are linked in prokaryotes.**

Eukaryotic circadian clocks involve a complex TTFL system that requires regulated gene expression at every level from transcriptional to post-translational steps: DNA methylation and the histone code, RNA processing, translation efficiency, phosphorylation and other protein modifications (37). In contrast, a biochemical oscillator in the cyanobacteria *Synechococcus elongatus* can independently generate a ~24-hour rhythm. Three proteins, Kai-A, -B and -C, form a nanocomplex that regulates two key activities of KaiC: ATPase and autophosphorylation. The result is an autonomous and self-sustained phosphorylation-based oscillator ticking with a period close to 24-hours. In a cellular context, this non-transcriptional oscillator controls transcriptional outputs that in turn add robustness to the biochemical oscillator via TTFLs (38-42).

Like all organisms, cyanobacteria synthesize SAM, required for essential transmethylation. In cyanobacteria we observed a more complex response to DZnep than in other organisms, perhaps due to the presence in these cells of a self-sustained biochemical oscillator that drives the TTFL system. While circadian period lengthened in response to low concentrations of DZnep, the amplitude increased (Fig. 5a). These observations were confirmed using a different reporter strain of *S. elongatus* (Fig. 5b). Probing the methyl cycle-clock relationship further revealed that intermediate concentrations of the drug caused no significant effect on period but still significantly increased the amplitude (Fig. S3). At 200  $\mu$ M however, a dramatic

reverse effect on oscillations was seen, the amplitude almost completely collapsing (Fig. S3).

Inhibition of methyltransferases by DZnep depends on the unique activity of AHCY to hydrolyze SAH. Some bacterial proteins, such as Mtn in *E.coli* or Pfu in *Streptococcus pyogenes*, however possess a SAH nucleosidase activity that cleaves SAH to adenine and ribosylhomocysteine (43). If this pathway for AHCY catabolism is active in *Synechococcus elongatus*, acting as a buffer against SAH accumulation, it would explain the blunted period response to DZnep compared to eukaryotes. Indeed, SAH nucleosidases have been identified in at least some *Synechococcus* strains, such as PCC7336 and MED-G69 (44). To circumvent the potential activity of a SAH nucleosidase in *Synechococcus elongatus*, we decided to use the global methylation inhibitor sinefungin, a natural analogue of SAM that directly binds to and inhibit methyltransferases (45, 46). A known antifungal and antibacterial agent whose activity as such has been shown to depend at least partially on the inhibition of mRNA 5'-cap methylation (47), it was previously used at 10 and 100  $\mu$ M on the cyanobacteria *Anabaena* to elicit non-lethal methylation-dependent morphological changes (48). We thus selected Sinefungin to further probe the link between methyltransferases and the circadian period in *Synechococcus elongatus*. In both reporter strains, significant dose-dependent period lengthening was observed. To contrast with Sinefungin, we also tested a selective bacterial DNA methyltransferase inhibitor with a different molecular footprint from DZnep or Sinefungin, the cyclopentaquinoline carboxylic acid EGX<sup>I</sup> (8-ethoxy-6-nitro-3a,4,5,9b-tetrahydro-3H-cyclopenta[c]quinoline-4-carboxylic acid) (49) (Fig. S4). Since its published IC<sub>50</sub> for *E. coli* DNA methyltransferase is 9.7  $\mu$ M (49), we used EGX<sup>I</sup> at 5 and 50  $\mu$ M but did not observe any consistent effects on the period, with only a mild period shortening in

*kaiBCp::luxAB* cells at 50  $\mu\text{M}$  (Fig S4). At 100  $\mu\text{M}$  or higher, Sinefungin showed some growth inhibition during the experiment, but *Synechococcus* still showed healthy rhythms. In contrast, at 100  $\mu\text{M}$  or higher EGX<sup>I</sup> was very toxic to cyanobacteria, causing a dramatic collapse of luciferase intensity, with poor rhythms from which circadian parameters could not be reliably extracted. Together these data show that the circadian clock in cyanobacteria —separated by 2 billion years of evolution from humans— is sensitive to methylation inhibition. This is especially meaningful considering that the cyanobacterial core clock is a phosphorylation-based biochemical oscillator. This also underlines the fundamental role that methyl metabolism kept in the control of physiology and behavior across evolution. Alternative metabolic pathways branching from the methyl cycle may prevent the accumulation of SAH and make prokaryotes more resistant to methylation inhibition by nutrient deprivation.

## **The somite segmentation clock and methyl cycle are linked**

Our results so far have shown that the link between the methyl cycle and the circadian TTFL is conserved. What about other biological timekeepers? While the circadian clock involves a TTFL that oscillates with a period near 24 hours, another TTFL, called the somite segmentation clock, cycles much faster and orchestrates the appearance of new somites from the paraxial mesoderm of the developing embryo in vertebrates (Fig. 6). In mouse, the underlying molecular oscillator is centered on the transcription factor *Hairy & Enhancer Of Split 7* (*Hes7*), whose expression oscillates with a period close to 2 hours by negative feedback that also induces oscillations of *Notch* and *Fgf* signaling (50, 51).

Like circadian clock genes, *Hes7* oscillatory expression can be monitored in real-time from transgenic embryo expressing highly destabilized luciferase under the control of the *Hes7* promoter. Testing increasing concentrations of DZnep on these transgenic embryos revealed uncanny similarities with results seen so far: an increase in period length accompanied by a decrease in amplitude of *Hes7* oscillations (Fig. 6). This once more illustrates the importance of the methyl cycle in the regulation of transcriptional programs orchestrating development, physiology and behaviour.

Here we provide evidence for the existence of an ancient link between the methyl cycle and biological timekeepers. In the course of more than 2 billion years of cellular evolution, during which the biological clock and the methyl cycle have adapted to a multicellular eukaryotic existence, the link between these two processes has remained active. Further investigations should reveal how the link itself has evolved, and which methylated substrates and methyltransferases are critical for its function.

## DISCUSSION

Solar ultraviolet radiation played a critical role in prebiotic chemistry and has been involved in the origin of chirality (52), the synthesis of alcohols, aldehydes (notably formaldehyde), and organic acids (53), as well as that of amino acids (54) and ribonucleotides (55). The presence of methylation transfer in the prebiotic world probably caused the incorporation of methyl chemistry in early life-forms. The energy of UV photons however can also degrade biologically important molecules, preventing abiogenesis. Once autocatalytic pseudo-life forms evolved with more complex chemistry, avoidance mechanisms may have provided increased fitness in

such an environment. The origin of the circadian clock on the early Earth is likely to have been a simple sensing of molecules present in the milieu, increasing or decreasing under UV exposure and triggering an appropriate response. Formaldehyde, increasing during the day under the action of UV on carbon monoxide and water vapor (53), could have been such a chemical marker of daylight, affecting the chemistry of early life-forms by methylation. A conserved link between methyl transfer and the circadian clock may have arisen from such a scenario.

The most surprising data obtained here is the almost identical response of unicellular algae and vertebrates to DZnep despite their evolutionary divergence more than 1 billion years ago, the comparable effect of methylation inhibitors on cyanobacterial circadian clock (2 billion years of evolutionary divergence), and the conservation of this biochemical link in the control of the somite segmentation clock. So far, only a small number of examples have been reported that identified aspects of circadian timekeeping shared among rhythmic life, such as oxidation cycles of peroxiredoxin (34, 56, 57) and regulation by oscillating intracellular magnesium concentrations (58).

In mammalian cells we previously reported that methyl cycle inhibition decreased the methylation of internal adenosines in mRNA (m6A), as well as that of histones (8). While specific m6A inhibition was sufficient to elicit period elongation, the contribution of histone methylation to the period elongation obtained by DZnep was likely significant, as well as that of other methylation sites in mRNA, rRNA and tRNA. Due to the considerable heterogeneity in mechanisms regulating gene expression and function in organisms tested here, identifying a single mechanism

explaining period elongation would be a difficult undertaking and is beyond the scope of the present work. We mentioned in the introduction that the oldest MTases are RNA methyltransferases (5), it is therefore tempting to propose that inhibition of RNA methylation may at least partially contribute to the period lengthening. That sinefungin, a confirmed mRNA cap-methyltransferase inhibitor (47), was able to lengthen the cyanobacterial clock period while EGX<sup>I</sup>, a DNA methylation inhibitor, was not support this hypothesis. It is also possible that the effects of methyl cycle inhibition on period and amplitude in eukaryotes arise from different mechanisms, e. g. on the inhibition of mRNA and histone methylation, respectively. More experiments should clarify these points.

The presence of a SAH nucleosidase in *S. elongatus* may have blunted the effect of DZnep, but even with 100  $\mu$ M sinefungin the period lengthened only about 2 hours. It should be mentioned that our luciferase reporter system is a reporter for the driven TTFL, not for the KaiABC oscillator *per se*. It is therefore possible that methylation inhibition only affected the coupling between the nanocomplex and the TTFL, which may explain why the increase in period was less pronounced compared to most eukaryotes tested here. In eukaryotic cells, luciferase reporter systems are a direct read-out of the core oscillator that has evolved more dependent on the TTFL, and as a result may have become more sensitive to perturbations affecting gene expression such as inhibition of RNA and histone methylation.

The somite segmentation clock was strongly affected by inhibition of AHCY, which is in line with the importance of 1 carbon metabolism for embryonic development. As can be seen in the Movie S3, showing similar results to Movie S2 but merged with

brightfield images and displaying luminescence as a pseudo-color green, period lengthening of the oscillatory expression of *Hes7-luciferase* occurred together with a pronounced delay in the growth of the caudal tip of the presomitic mesoderm as well as in the appearance of new somites, demonstrating that the molecular clock as well as its output, i.e. the somitogenesis, were affected by DZnep. The mechanisms underlying this period lengthening may be distinct from those involved in the lengthening of the circadian period. Considering the short period of *Hes7* oscillations — 2 h, and the importance of 3'-UTR-dependent regulation of *Hes7* mRNA turnover for its cyclic expression (62), the inhibition of mRNA methylation may at least in part contribute to the results observed.

Despite being one of the most potent AHCY inhibitors (11), DZnep is sometimes erroneously sold and used as a “specific” histone methyltransferase EZH2 inhibitor because of the misinterpretation of a report showing that it inhibits —without any data on specificity— histone methylation by EZH2 in cancer cells (59). More recent reports showed that, in line with its inhibitory effect on AHCY (60, 61), DZnep globally inhibits histone methylation.

Since we sought to inhibit the methyl cycle in organisms from bacteria to humans, these investigations were by necessity limited to the pharmacological inhibition of AHCY, because irreversible genetic disruption of AHCY in all organisms would have been much less feasible, notably due to likely embryonic lethality or developmental arrest in metazoa, cell cycle/growth disruption, and the existence of multiple uncharacterized homologues in many organisms tested here. This work puts the

spotlight on the methyl cycle and calls for more investigations into how it regulates physiology and behavior.

## AKNOWLEDGEMENTS

This work was supported in part by the Ministry of Education, Culture, Sports, Science and Technology of Japan: Grant-in-aid for Scientific Research on Innovative Areas (26116713, J.-M. F.), for Young Scientists (26870283, J.-M. F.), for Scientific Research A (15H01843, H.O.), a grant for Core Research for Evolutional Science and Technology, Japan Science and Technology Agency (CREST/JPMJCR14W3, H.O.). J.-M.F. was also supported by grants from the Kato Memorial Bioscience Foundation, the Senri Life Science Foundation (S-26003), the Mochida Memorial Foundation for Medical and Pharmaceutical Research, and the Kyoto University internal grant ISHIZUE, and H.O. was also supported by the Kobayashi International Scholarship Foundation. C.H.J. is supported by grants from the USA NIH/NIGMS: GM067152 and GM107434. G.vO. is supported by a Royal Society University Research Fellowship (UF160685) and research grant (RGF\EA\180192). D.A.G. is supported by grants from the National Research Agency (ANPCyT, PICT-2015-0572) and the National University of Quilmes. We thank Adrienne K. Mehalow, Jay C. Dunlap, John O'Neill and Tokitaka Oyama for useful discussion and for kindly accepting to perform experiments. The authors thank G. Wolber, Freie Universität Berlin, Germany, for providing a LigandScout 4.2 license.

## Author Contributions

Conceptualization, J.-M.F. and H.O.; Methodology, J.-M.F., C.R., M.V., S.J.C., T.K.T., Y.X., M.L.J., M.L.L., K.Y.-K., D.W., R.Ka., T.M., R.S., D.A.G., C.H.J.,



396 G.v.O.; investigation, J.-M.F., S.Y., C.R., M.V., S.J.C., T.K.T., Y.X., M.L.J., R.Ko.,  
397 M.L.L., K.Y.-K., T.M., D.A.G., G.v.O.; homology modelling, C.R.; original draft, J.-  
398 M.F.; reviewing & editing, J.-M.F., C.R., T.K.T., Y.X., K.Y.-K., D.W., R.Ka., T.M.,  
399 R.S., D.A.G., C.H.J., G.v.O.; Funding Acquisition, J.-M.F., D.A.G., C.H.J., G.v.O  
400 and H.O.; Supervision, J.-M.F.  
401  
402

## 403 METHODS

404

### 405 **Molecular modelling and sequence analyses**

406 Homology models were obtained as described in the SI Appendix.

407

### 408 **Assay for effect of the inhibition of the methyl cycle on vertebrate circadian** 409 **clock.**

410 Human U-2 OS cells stably transfected with a *Bmal1*-luciferase reporter vector (22)  
411 and mouse PER2::LUC MEFs (23) cell lines were cultivated as previously described  
412 (8). Briefly, cells were seeded into 35 mm dishes (Corning) and allow to grow to  
413 confluence in DMEM/F12 medium (Nacalai) containing  
414 penicillin/streptomycin/amphotericin (Nacalai). Cells were then shocked by  
415 dexamethasone (Sigma-Aldrich) 200 nM for 2 hours, followed by a medium changed  
416 including 1 mM luciferine (Nacalai). 35 mm dishes were then transferred to an 8-  
417 dishes luminometer-incubator (Kronos Dio, Atto). Photons were counted in bins of 2  
418 min at a frequency of 10 min. DZnep was purchased from Sigma-Aldrich.

419 Zebrafish cell line and bioluminescence assays. The generation of a *per1b*-luciferase  
420 cell line from zebrafish PAC2 cells has been previously described (64). Cells were  
421 cultured in Leibovitz's L-15 medium (Gibco) containing 15% fetal bovine serum  
422 (Biochrom AG), 50 U/mL penicillin/streptomycin (Gibco), and 50 µg/mL gentamicin  
423 (Gibco). Cells were seeded at a density of 50,000-100,000 cells per well in  
424 quadruplicate wells of a 96-well plate in medium supplemented with 0.5 mM beetle  
425 luciferin (Promega), and drugs were prepared in water and added at the concentrations

indicated in the figures and legends. Plates were sealed with clear adhesive TopSeal (Perkin Elmer, Waltham, MA, USA). Cells were exposed to a 12:12 LD cycle for 7 days and then transferred into DD for at least 3 days. Bioluminescence was monitored on a Packard TopCount NXT scintillation counter (28°C). DZnep was purchased from Sigma-Aldrich.

Period and amplitude were estimated by BioDare2 (63).

# **Assay for effect of the inhibition of the methyl cycle on invertebrate circadian clock.**

Halteres of two- to seven-day old transgenic *ptim*-TIM-LUC males (65) kept under 12 h :12 h light:dark cycles (LD) at 25°C were bilaterally dry dissected. Each pair was transferred into one well of a 96 well plate (Topcount, Perkin Elmer) filled with medium containing 80% Schneider's medium (Sigma), 20% inactivated Fetal Bovine Serum (Capricorn) and 1% PenStrep (Sigma). Medium was fortified with 226 µM Luciferin (Biosynth) and supplemented with 10, 100, or 250 µM Dznepe A diluted in PBS. Plates were sealed with clear adhesive covers and transferred to a TopCount plate reader (PerkinElmer). Bioluminescence emanating from each well was measured hourly in LD for two days, followed by 5 days of constant darkness (DD) at 25°C as previously described (66). The *ptim*-TIM-LUC reporter contains the timeless (*tim*) promoter sequences driving rhythmic expression of the *tim* cDNA, which is fused to the firefly luciferase cDNA.

*C. elegans* strain N2 (Bristol strain, wild-type was provided by the Caenorhabditis Genetics Center, University of Minnesota ([cbs.umn.edu/cgc/home](https://cbs.umn.edu/cgc/home)). Stocks were maintained on plates with nematode growth medium (NGM) seeded with

HB101 *Escherichia coli* strain, under 12-h/12-h LD/CW cycle (400/0 lx and CW (18.5/20 °C,  $\Delta = 1.5 \pm 0.125$  °C) environmental cycles. Transgenic animals were generated by microinjection of a *Psur-5::luc::gfp* construct at 50 or 100 ng/ $\mu$ L with the pRF4 marker (100 ng/ $\mu$ L) (29, 67). Bioluminescence recordings with nematodes are described in the SI Appendix.

Period and amplitude were estimated by BioDare2 (63).

# **Assay for effect of the inhibition of the methyl cycle on plant and algae circadian clock.**

*Ostreococcus tauri* cells transgenically expressing a translational fusion of CCA1 to luciferase from the CCA1 promoter (CCA1-LUC) (36) were grown, imaged, and analysed as described previously (58).

For protoplast isolation and luminescent imaging, plants expressing luciferase from the CCA1 promoter in the Col-0 background (kindly provided by Karen Halliday, University of Edinburgh) were grown in sterile soil under long-day conditions (16 h light/8 h dark) at 22°C under 60-70  $\mu$ mol m<sup>-2</sup>s<sup>-1</sup> white LED tube lights (Impact T8). Protoplasts were isolated from 3-week old leaves as previously described (68). Protoplasts in a solution of 1 mM D-luciferin (Biosynth AG), 5 % fetal bovine serum (Sigma), 50 $\mu$ g/ml ampicillin, 140 mM NaCl, 115 mM CaCl<sub>2</sub>, 4.6 mM KCl, 1.86 mM MES pH 5.7 and 4.6 mM glucose were added to white, flat-bottomed 96-well plates (Lumitrac, Greiner Bio-one) at a concentration of 2x10<sup>5</sup> cells/ml. DZnep (S7120 Selleckchem) was added to the protoplasts to achieve concentrations of 0, 0.125, 0.25, 0.5 or 1  $\mu$ M from a 1 mM stock solution (prepared in distilled H<sub>2</sub>O) to a total volume of 200  $\mu$ L per well. Plates were sealed with a clear adhesive lid (TopSeal-A, Perkin

Elmer). Protoplast luminescence was read by a LB942 Tristar<sup>2</sup> plate reader (Berthold Technologies Ltd) every 50 minutes for 3 seconds per well, and kept under continuous red (630 nm) and blue (470 nm) LED light ( $5 \mu\text{mol m}^{-2}\text{s}^{-1}$  each) at 19°C.

*Chlamydomonas reinhardtii* strain CBR carrying a codon-adapted luciferase reporter driven by the *tufA* promoter in the chloroplast genome (69, 70) was used. Culture preparation, bioluminescence monitoring, and data analysis were carried out as described previously (70). Briefly, 5-day-old algal cultures on HS agar medium were cut out along with the agar by using a glass tube, and transferred to separate wells of a 96-well microtiter plates. Luciferin (final conc. 200  $\mu\text{M}$ ) and various concentrations of DZnep (Sigma) were added to the wells. Algae were synchronized by a single cycle of 12-h darkness/12-h light ( $30 \mu\text{mol m}^{-2} \text{s}^{-1}$ ) at 17°C before bioluminescence monitoring using a custom-made luminometer-incubator (71) in DD at 17°C.

Period and amplitude were estimated by BioDare2 (63).

# **Assay for effect of the inhibition of the methyl cycle on prokaryotic circadian clock.**

*Vibrio harveyi* luciferase encoded by *luxA* and *luxB* (*luxAB*) genes was used as a luminescence reporter in cyanobacterium *Synechococcus elongatus* PCC 7942. Two cyanobacterial clock-regulated reporter strains, *kaiBCp::luxAB* (72) and *psbAIp::luxAB* (73) were selected for the test, i.e. expression of the *luxAB* was under control of the promoters of the central clock genes *kaiBC* and the Class I photosynthetic gene *psbAI*, respectively. *Synechococcus* strains were grown in modified BG11 media (74) supplemented with 40  $\mu\text{g/ml}$  of spectinomycin. The

cultures grown on BG11 agar plates for 3 days at 30°C under continuous cool-white illumination (LL) (50  $\mu\text{E}/\text{m}^2 \text{ s}$ ) were toothpicked onto fresh BG11 agar plates containing 0.015 g/L of L-methionine and different concentrations of 3-deazaneplanocin A hydrochloride (Sigma), sinefungin (Abcam) or EGX<sup>1</sup> (ChemBridge 5790780). After a single 12h dark pulse for synchronization, assay of the *in vivo* luminescence rhythms was performed as described previously (72).

Period and amplitude were estimated by BioDare2 (63).

#### **Measurement of *Hes7* oscillations in the mouse presomitic mesoderm**

Presomitic mesoderm (PSM) tissues from three littermate p*Hes7*-UbLuc Tg embryos were embedded in 0.35% LMP-agarose/culture medium (10% FBS-DMEM/F12), in a silicon mold mounted onto a  $\phi 35\text{mm}$ -glass bottom dish, and luciferin-containing medium with DZnep or vehicle (MilliQ water) were added.

Time-lapse imaging of PSM was performed with an inverted microscope (Olympus IX81) equipped with an Olympus x10 UPlanApo objective (N.A.: 0.8) and a VersArray cooled-CCD camera. 16-bit images were acquired every 5min with Image-Pro Plus (Media Cybernetics), with 2x2 and 4x4 binning and exposures of 100 ms and 4 m 25 s for DIC and chemiluminescent images, respectively. Raw imaging data were processed and quantified by ImageJ (75).

Period and amplitude were estimated by BioDare2 (63).

## 517     **References**

- 518     1. Lippi G & Plebani M (2012) Hyperhomocysteinemia in health and disease: Where  
519     we are now, and where do we go from here ?. *Clin Chem Lab Med* 50(12): 2075-  
520     2080.
- 521     2. Cantoni GL (1985) The role of S-adenosylhomocysteine in the biological  
522     utilization of S-adenosylmethionine. *Prog Clin Biol Res* 198: 47-65.
- 523     3. Chiang PK & Cantoni GL (1979) Perturbation of biochemical transmethylation by  
524     3-deazaadenosine in vivo. *Biochem Pharmacol* 28(12): 1897-1902.
- 525     4. Hoffman DR, Marion DW, Cornatzer WE & Duerre JA (1980) S-  
526     adenosylmethionine and S-adenosylhomocystein metabolism in isolated rat liver.  
527     effects of L-methionine, L-homocystein, and adenosine. *J Biol Chem* 255(22): 10822-  
528     10827.
- 529     5. Rana AK & Ankri S (2016) Reviving the RNA world: An insight into the  
530     appearance of RNA methyltransferases. *Front Genet* 7: 99.
- 531     6. Van Trump JE & Miller SL (1972) Prebiotic synthesis of methionine. *Science*  
532     178(4063): 859-860.
- 533     7. Waddell TG, Eilders LL, Patel BP & Sims M (2000) Prebiotic methylation and the  
534     evolution of methyl transfer reactions in living cells. *Orig Life Evol Biosph* 30(6):  
535     539-548.
- 536     8. Fustin JM, *et al* (2013) RNA-methylation-dependent RNA processing controls the  
537     speed of the circadian clock. *Cell* 155(4): 793-806.

- 538 9. Guranowski A, Montgomery JA, Cantoni GL & Chiang PK (1981) Adenosine  
539 analogues as substrates and inhibitors of S-adenosylhomocysteine hydrolase.  
540 *Biochemistry* 20(1): 110-115.
- 541 10. Chiang PK, Richards HH & Cantoni GL (1977) S-adenosyl-L-homocysteine  
542 hydrolase: Analogues of S-adenosyl-L-homocysteine as potential inhibitors. *Mol*  
543 *Pharmacol* 13(5): 939-947.
- 544 11. Tseng CK, *et al* (1989) Synthesis of 3-deazaneplanocin A, a powerful inhibitor of  
545 S-adenosylhomocysteine hydrolase with potent and selective in vitro and in vivo  
546 antiviral activities. *J Med Chem* 32(7): 1442-1446.
- 547 12. Keiser MJ, *et al* (2007) Relating protein pharmacology by ligand chemistry. *Nat*  
548 *Biotechnol* 25(2): 197-206.
- 549 13. Gfeller D, Michielin O & Zoete V (2013) Shaping the interaction landscape of  
550 bioactive molecules. *Bioinformatics* 29(23): 3073-3079.
- 551 14. Yang X, *et al* (2003) Catalytic strategy of S-adenosyl-L-homocysteine hydrolase:  
552 Transition-state stabilization and the avoidance of abortive reactions. *Biochemistry*  
553 42(7): 1900-1909.
- 554 15. Kusakabe Y, *et al* (2015) Structural insights into the reaction mechanism of S-  
555 adenosyl-L-homocysteine hydrolase. *Sci Rep* 5: 16641.
- 556 16. Brzezinski K, Dauter Z & Jaskolski M (2012) High-resolution structures of  
557 complexes of plant S-adenosyl-L-homocysteine hydrolase (*lupinus luteus*). *Acta*  
558 *Crystallogr D Biol Crystallogr* 68(Pt 3): 218-231.



- 559 17. Gomi T, *et al* (1990) Site-directed mutagenesis of rat liver S-  
560 adenosylhomocysteinase. effect of conversion of aspartic acid 244 to glutamic acid on  
561 coenzyme binding. *J Biol Chem* 265(27): 16102-16107.
- 562 18. Ault-Riche DB, Yuan CS & Borchardt RT (1994) A single mutation at lysine 426  
563 of human placental S-adenosylhomocysteine hydrolase inactivates the enzyme. *J Biol*  
564 *Chem* 269(50): 31472-31478.
- 565 19. Takata Y, *et al* (2002) Catalytic mechanism of S-adenosylhomocysteine  
566 hydrolase. site-directed mutagenesis of asp-130, lys-185, asp-189, and asn-190. *J Biol*  
567 *Chem* 277(25): 22670-22676.
- 568 20. Yamada T, *et al* (2005) Catalytic mechanism of S-adenosylhomocysteine  
569 hydrolase: Roles of his 54, Asp130, Glu155, Lys185, and Aspl89. *Int J Biochem Cell*  
570 *Biol* 37(11): 2417-2435.
- 571 21. Sganga MW, Aksamit RR, Cantoni GL & Bauer CE (1992) Mutational and  
572 nucleotide sequence analysis of S-adenosyl-L-homocysteine hydrolase from  
573 rhodobacter capsulatus. *Proc Natl Acad Sci U S A* 89(14): 6328-6332.
- 574 22. Baggs JE, *et al* (2009) Network features of the mammalian circadian clock. *PLoS*  
575 *Biol* 7(3): e52.
- 576 23. Yoo SH, *et al* (2004) PERIOD2::LUCIFERASE real-time reporting of circadian  
577 dynamics reveals persistent circadian oscillations in mouse peripheral tissues. *Proc*  
578 *Natl Acad Sci U S A* 101(15): 5339-5346.
- 579 24. Bargiello TA, Jackson FR & Young MW (1984) Restoration of circadian  
580 behavioural rhythms by gene transfer in drosophila. *Nature* 312(5996): 752-754.

- 581 25. Young MW, Jackson FR, Shin HS & Bargiello TA (1985) A biological clock in  
582 *drosophila*. *Cold Spring Harb Symp Quant Biol* 50: 865-875.
- 583 26. Hardin PE, Hall JC & Rosbash M (1990) Feedback of the *drosophila* period gene  
584 product on circadian cycling of its messenger RNA levels. *Nature* 343(6258): 536-  
585 540.
- 586 27. Kippert F, Saunders DS & Blaxter ML (2002) *Caenorhabditis elegans* has a  
587 circadian clock. *Curr Biol* 12(2): R47-9.
- 588 28. Saigusa T, *et al* (2002) Circadian behavioural rhythm in *caenorhabditis elegans*.  
589 *Curr Biol* 12(2): R46-7.
- 590 29. Goya ME, Romanowski A, Caldart CS, Benard CY & Golombek DA (2016)  
591 Circadian rhythms identified in *caenorhabditis elegans* by in vivo long-term  
592 monitoring of a bioluminescent reporter. *Proc Natl Acad Sci U S A* 113(48): E7837-  
593 E7845.
- 594 30. Lee S, Doxey AC, McConkey BJ & Moffatt BA (2012) Nuclear targeting of  
595 methyl-recycling enzymes in *arabidopsis thaliana* is mediated by specific protein  
596 interactions. *Mol Plant* 5(1): 231-248.
- 597 31. Grbesa I, *et al* (2017) Mutations in S-adenosylhomocysteine hydrolase (AHCY)  
598 affect its nucleocytoplasmic distribution and capability to interact with S-  
599 adenosylhomocysteine hydrolase-like 1 protein. *Eur J Cell Biol* 96(6): 579-590.
- 600 32. Matsuo T & Ishiura M (2011) *Chlamydomonas reinhardtii* as a new model system  
601 for studying the molecular basis of the circadian clock. *FEBS Lett* 585(10): 1495-  
602 1502.

- 603 33. van Ooijen G, *et al* (2013) Functional analysis of casein kinase 1 in a minimal  
604 circadian system. *PLoS One* 8(7): e70021.
- 605 34. O'Neill JS, *et al* (2011) Circadian rhythms persist without transcription in a  
606 eukaryote. *Nature* 469(7331): 554-558.
- 607 35. van Ooijen G, Dixon LE, Troein C & Millar AJ (2011) Proteasome function is  
608 required for biological timing throughout the twenty-four hour cycle. *Curr Biol*  
609 21(10): 869-875.
- 610 36. Corellou F, *et al* (2009) Clocks in the green lineage: Comparative functional  
611 analysis of the circadian architecture of the picoeukaryote *ostreococcus*. *Plant Cell*  
612 21(11): 3436-3449.
- 613 37. Sassone-Corsi P & Christen Y (2016) *A Time for Metabolism and Hormones*,  
614 (Springer International Publishing : Imprint: Springer, Cham), pp 132.
- 615 38. Nakajima M, *et al* (2005) Reconstitution of circadian oscillation of cyanobacterial  
616 KaiC phosphorylation in vitro. *Science* 308(5720): 414-415.
- 617 39. Johnson CH, Zhao C, Xu Y & Mori T (2017) Timing the day: What makes  
618 bacterial clocks tick?. *Nat Rev Microbiol* 15(4): 232-242.
- 619 40. Ishiura M, *et al* (1998) Expression of a gene cluster *kaiABC* as a circadian  
620 feedback process in cyanobacteria. *Science* 281(5382): 1519-1523.
- 621 41. Liu Y, *et al* (1995) Circadian orchestration of gene expression in cyanobacteria.  
622 *Genes Dev* 9(12): 1469-1478.

- 623 42. Qin X, Byrne M, Xu Y, Mori T & Johnson CH (2010) Coupling of a core post-  
624 translational pacemaker to a slave transcription/translation feedback loop in a  
625 circadian system. *PLoS Biol* 8(6): e1000394.
- 626 43. Walker RD & Duerre JA (1975) S-adenosylhomocysteine metabolism in various  
627 species. *Can J Biochem* 53(3): 312-319.
- 628 44. Shih PM, *et al* (2013) Improving the coverage of the cyanobacterial phylum using  
629 diversity-driven genome sequencing. *Proc Natl Acad Sci U S A* 110(3): 1053-1058.
- 630 45. HAMILL RL & HOEHN MM (1973) A9145, a new adenine-containing  
631 antifungal antibiotic. *J Antibiot (Tokyo)* 26: 463.
- 632 46. Vedel M, Lawrence F, Robert-Gero M & Lederer E (1978) The antifungal  
633 antibiotic sinefungin as a very active inhibitor of methyltransferases and of the  
634 transformation of chick embryo fibroblasts by rous sarcoma virus. *Biochem Biophys*  
635 *Res Commun* 85(1): 371-376.
- 636 47. Zheng S, *et al* (2006) Mutational analysis of encephalitozoon cuniculi mRNA cap  
637 (guanine-N7) methyltransferase, structure of the enzyme bound to sinefungin, and  
638 evidence that cap methyltransferase is the target of sinefungin's antifungal activity. *J*  
639 *Biol Chem* 281(47): 35904-35913.
- 640 48. Fujita H, Syono K, Machida Y & Kawaguchi M (2008) Morphological effects of  
641 sinefungin, an inhibitor of S-adenosylmethionine-dependent methyltransferases, on  
642 *anabaena* sp. PCC 7120. *Microbes Environ* 23(4): 346-349.

- 643 49. Mashhoon N, Pruss C, Carroll M, Johnson PH & Reich NO (2006) Selective  
644 inhibitors of bacterial DNA adenine methyltransferases. *J Biomol Screen* 11(5): 497-  
645 510.
- 646 50. Kageyama R, Niwa Y, Isomura A, Gonzalez A & Harima Y (2012) Oscillatory  
647 gene expression and somitogenesis. *Wiley Interdiscip Rev Dev Biol* 1(5): 629-641.
- 648 51. Kobayashi T & Kageyama R (2014) Expression dynamics and functions of hes  
649 factors in development and diseases. *Curr Top Dev Biol* 110: 263-283.
- 650 52. Rosenberg RA, Abu Haija M & Ryan PJ (2008) Chiral-selective chemistry  
651 induced by spin-polarized secondary electrons from a magnetic substrate. *Phys Rev*  
652 *Lett* 101(17): 178301.
- 653 53. Bar-Nun A & Hartman H (1978) Synthesis of organic compounds from carbon  
654 monoxide and water by UV photolysis. *Orig Life* 9(2): 93-101.
- 655 54. Sarker PK, Takahashi J, Obayashi Y, Kaneko T & Kobayashi K (2013) Photo-  
656 alteration of hydantoins against UV light and its relevance to prebiotic chemistry.  
657 *Advances in Space Research* 51(12): 2235-2240.
- 658 55. Powner MW, Gerland B & Sutherland JD (2009) Synthesis of activated  
659 pyrimidine ribonucleotides in prebiotically plausible conditions. *Nature* 459(7244):  
660 239-242.
- 661 56. O'Neill JS & Reddy AB (2011) Circadian clocks in human red blood cells. *Nature*  
662 469(7331): 498-503.

- 663 57. Edgar RS, *et al* (2012) Peroxiredoxins are conserved markers of circadian  
664 rhythms. *Nature* 485(7399): 459-464.
- 665 58. Feeney KA, *et al* (2016) Daily magnesium fluxes regulate cellular timekeeping  
666 and energy balance. *Nature* 532(7599): 375-379.
- 667 59. Tan J, *et al* (2007) Pharmacologic disruption of polycomb-repressive complex 2-  
668 mediated gene repression selectively induces apoptosis in cancer cells. *Genes Dev*  
669 21(9): 1050-1063.
- 670 60. Miranda TB, *et al* (2009) DZNep is a global histone methylation inhibitor that  
671 reactivates developmental genes not silenced by DNA methylation. *Mol Cancer Ther*  
672 8(6): 1579-1588.
- 673 61. Zeybel M, *et al* (2017) A proof-of-concept for epigenetic therapy of tissue  
674 fibrosis: Inhibition of liver fibrosis progression by 3-deazaneplanocin A. *Mol Ther*  
675 25(1): 218-231.
- 676 62. Nitanda Y, *et al* (2014) 3'-UTR-dependent regulation of mRNA turnover is  
677 critical for differential distribution patterns of cyclic gene mRNAs. *Febs J* 281(1):  
678 146-156.
- 679 63. Zielinski T, Moore AM, Troup E, Halliday KJ & Millar AJ (2014) Strengths and  
680 limitations of period estimation methods for circadian data. *PLoS One* 9(5): e96462.
- 681 64. Vallone D, Gondi SB, Whitmore D & Foulkes NS (2004) E-box function in a  
682 period gene repressed by light. *Proc Natl Acad Sci U S A* 101(12): 4106-4111.

683 65. Lamba P, Foley LE & Emery P (2018) Neural network interactions modulate  
684 CRY-dependent photoresponses in drosophila. *J Neurosci* 38(27): 6161-6171.

685 66. Chen C, Xu M, Anantaprakorn Y, Rosing M & Stanewsky R (2018) Nocte is  
686 required for integrating light and temperature inputs in circadian clock neurons of  
687 drosophila. *Curr Biol* 28(10): 1595-1605.e3.

688 67. Mello CC, Kramer JM, Stinchcomb D & Ambros V (1991) Efficient gene transfer  
689 in C.elegans: Extrachromosomal maintenance and integration of transforming  
690 sequences. *Embo J* 10(12): 3959-3970.

691 68. Hansen LL & van Ooijen G (2016) Rapid analysis of circadian phenotypes in  
692 arabidopsis protoplasts transfected with a luminescent clock reporter. *J Vis Exp* (115).  
693 doi(115): 10.3791/54586.

694 69. Hwang S, Kawazoe R & Herrin DL (1996) Transcription of tufA and other  
695 chloroplast-encoded genes is controlled by a circadian clock in chlamydomonas. *Proc*  
696 *Natl Acad Sci U S A* 93(3): 996-1000.

697 70. Matsuo T, *et al* (2008) A systematic forward genetic analysis identified  
698 components of the chlamydomonas circadian system. *Genes Dev* 22(7): 918-930.

699 71. Okamoto K, Onai K, Ezaki N, Ofuchi T & Ishiura M (2005) An automated  
700 apparatus for the real-time monitoring of bioluminescence in plants. *Anal Biochem*  
701 340(2): 187-192.

702 72. Xu Y, Mori T & Johnson CH (2003) Cyanobacterial circadian clockwork: Roles  
703 of KaiA, KaiB and the kaiBC promoter in regulating KaiC. *Embo J* 22(9): 2117-2126.

704 73. Kondo T, *et al* (1993) Circadian rhythms in prokaryotes: Luciferase as a reporter  
 705 of circadian gene expression in cyanobacteria. *Proc Natl Acad Sci U S A* 90(12):  
 706 5672-5676.

707 74. Bustos SA & Golden SS (1991) Expression of the psbDII gene in synechococcus  
 708 sp. strain PCC 7942 requires sequences downstream of the transcription start site. *J*  
 709 *Bacteriol* 173(23): 7525-7533.

710 75. Shimojo H, Harima Y & Kageyama R (2014) Visualization of notch signaling  
 711 oscillation in cells and tissues. *Methods Mol Biol* 1187: 169-179.

712

713



## FIGURE LEGENDS

**Fig. 1: Adenosylhomocysteinase is a highly conserved protein.** (a) Structural superposition of AHCY from the 9 organisms investigated here, using human (1LI4), mouse (5AXA) or lupin (3OND) crystal structures as templates. The blue loop is specific to plants and green algae; DZnep is shown in yellow, NAD<sup>+</sup> in grey. See also Movie S1. (b) Docking simulation of human AHCY with DZnep, based on the 1LI4 crystal structure of human AHCY complexed with Neplanocin A, an analogue of DZnep. The amino acids involved in DZnep binding are indicated with their position. See Fig. S2 for docking simulations of DZnep to AHCY from other organisms. Red and green arrows are hydrogen bonds, yellow spheres are hydrophobic effects. The estimated free energy of binding for depicted DZnep docking conformation was -9.87 kcal/mol. (c) Discontinuous alignment of amino acids contributing to the binding of DZnep, using the human sequence as a reference and with sequence identities shown on the right. When amino acids are identical to human, a dot is shown in the alignment. The sequence logo on top is a graphical representation of the conservation of amino acids, with the consensus symbols below (\* = fully conserved residue, : = conservation of strongly similar properties, . = conservation of weakly similar properties). The positions of selected conserved amino acids are given for the human sequence. (d) Molecular docking simulations of AHCY with adenosine (top) or DZnep (below) showing comparable binding free energies in all organisms. Colors represent full sequence identities, relative to human.

**Fig. 2: The link between the methyl cycle and the clock is conserved in vertebrates.** (a) Left panel shows mean luminescence +/- SEM of human U-2 OS

cells stably transfected by a *Bmall*-luc reporter and treated with increasing concentrations of DZnep. Middle panel shows mean  $\pm$  SEM of period,  $n = 3$ . Right panel shows mean  $\pm$  SEM of amplitude,  $n = 3$  dishes. Same analyses were performed with PER2::LUC mouse embryonic fibroblasts,  $n = 3$  dishes **(b)**, and PAC-2 zebrafish cells stably transfected with a *Per1b*-luciferase reporter,  $n = 4$  dishes, mean  $\pm$  SEM **(c)**. These experiments were independently reproduced at least three times. All bar graphs analyzed by One-Way ANOVA followed by Bonferroni post-hoc test; all indicated comparisons at least  $p < 0.05$ .

**Fig. 3: The link between the methyl cycle and the clock is conserved in invertebrates.** **(a)** Real-time luminescence from halteres in culture dissected from *ptim*-TIM-LUC male flies. Luminescence traces show mean  $\pm$  SEM of  $n = 8$  halteres, with only the upper segment of the error bars shown for clarity. Middle and right panel shows mean  $\pm$  SEM of period and amplitude, respectively, for  $n =$  at least 8 halteres for each treatment group. All bar graphs analyzed by One-Way ANOVA followed by Bonferroni post-hoc test; all indicated comparisons at least  $p < 0.05$ . **(b)** Locomotor activity counts from detrended luminescence measurements of freely moving *Caenorhabditis elegans* populations of  $\sim 100$  nematodes treated with vehicle or 100  $\mu$ M DZnep, showing mean  $\pm$  SEM of  $n = 10$  populations. In the middle, population mean  $\pm$  SEM of period (left) and amplitude (right) compared by Student *t*-test; \*\*,  $p < 0.01$ ;  $n = 10$  populations treated with vehicle and  $n = 6$  treated with DZnep. The right panel shows mean  $\pm$  SEM of period obtained from single nematodes in isolation,  $n = 21$  controls and 22 for DZnep, analyzed by Student *t*-test, \*\*,  $p < 0.01$ .

**Fig. 4: The link between the methyl cycle and the clock is conserved in plants. (a)**

Left panel shows mean luminescence  $\pm$  SEM of *Arabidopsis thaliana* protoplasts bearing a *CCA1*pro:LUC reporter construct,  $n = 8$  wells per treatment, treated with different concentration of DZnep. For comparison between different runs, traces were aligned in relation to the first peak. Middle panel shows mean  $\pm$  SEM of amplitude,  $n = 8$ . Right panel shows mean  $\pm$  SEM of amplitude,  $n = 8$ . **(b)** Same as (a) but with *Ostreococcus tauri* cells carrying a CCA1-LUC reporter,  $n = 8$  wells. Middle panel shows mean  $\pm$  SEM of period,  $n = 8$  wells. No significance was observed between 10, 20 and 30  $\mu$ M, but the significance compared to 0  $\mu$ M became stronger, i.e.  $p < 0.05$ ,  $p < 0.001$ ,  $p < 0.0001$ , respectively, indicating dose-dependent effects. Right panel shows mean  $\pm$  SEM of amplitude,  $n = 8$  wells. **(c)** Same as (b) but with *Chlamydomonas reinhardtii* CBR strain cultures stably-transfected with a *tufA* promoter-lucCP reporter,  $n = 5$  wells. Middle panel shows mean  $\pm$  SEM of period,  $n = 5$  wells. Right panel shows mean  $\pm$  SEM of amplitude,  $n = 5$  wells. All bar graphs analyzed by One-Way ANOVA followed by Bonferroni post-hoc test; all indicated comparisons at least  $p < 0.05$ .

**Fig. 5: The link between the methyl cycle and the clock is conserved in cyanobacteria. (a)**

Left panel shows mean luminescence  $\pm$  SEM of *Synechococcus* PCC 7942 *kaiBCp::luxAB* knock-in strain treated with different concentrations of DZnep,  $n = 3$ , with only the upper section of the error bars shown for clarity. Middle panel shows mean period  $\pm$  SEM,  $n = 3$ . Right panel shows mean amplitude  $\pm$  SEM,  $n = 3$ . **(b)** Same as (a) but using *Synechococcus* PCC 7942 *psbAIp::luxAB* knock-in strain. Data for (a) and (b) were analyzed together with data from Fig. S3, showing additional concentrations of DZnep. **(c)** and **(d)** are the same as (a) and (b),

respectively, but with different Sinefungin concentrations as indicated over the graphs. In addition, bar charts in (c) and (d) show data obtained with higher concentrations of Sinefungin presented in Fig. S3. See also Fig. S4 for a comparison with EGX<sup>1</sup>. All bar graphs analyzed by One-Way ANOVA followed by Bonferroni post-hoc test; all indicated comparisons at least  $p < 0.05$ .

**Fig. 6: The somite segmentation clock is sensitive to methyl cycle inhibition. (a)** Representative detrended luminescence measurements from one cultured embryo per treatment as indicated in the legend on the right. **(b)** Mean period  $\pm$  SEM of  $n = 3$  embryos per treatment, with  $* = p < 0.05$ . **(c)** Mean amplitude  $\pm$  SEM of  $n = 3$  embryos per treatment, with  $** = p < 0.01$ . **(d)** Montage of luminescence time-lapse micrographs of one representative embryo for each treatment. One picture every 20 min is shown, starting from top left, each row corresponding to one *Hes7* expression cycle in the embryo treated with 0  $\mu$ M DZnep, as shown in (a). See also Movies S2 and S3. **(e)** Anatomic localization of the presomitic mesoderm in embryo and schematic representation of the pictures from (d). The yellow square defined the area from which luminescence was measured in (a).

**a**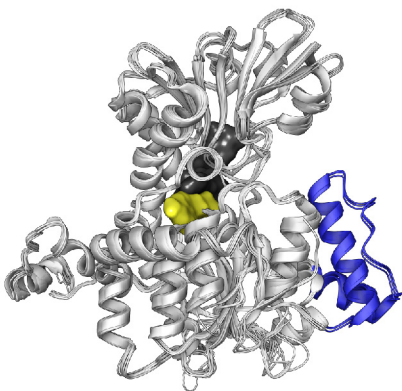**b**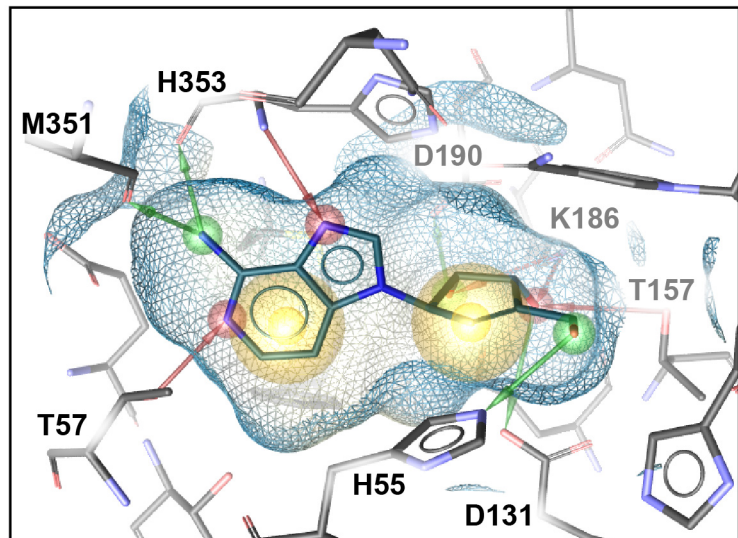**c**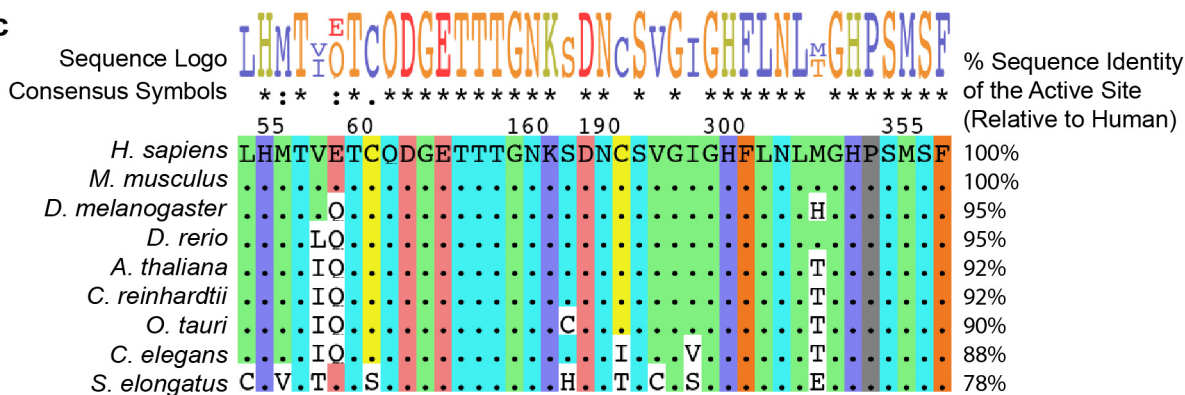**d**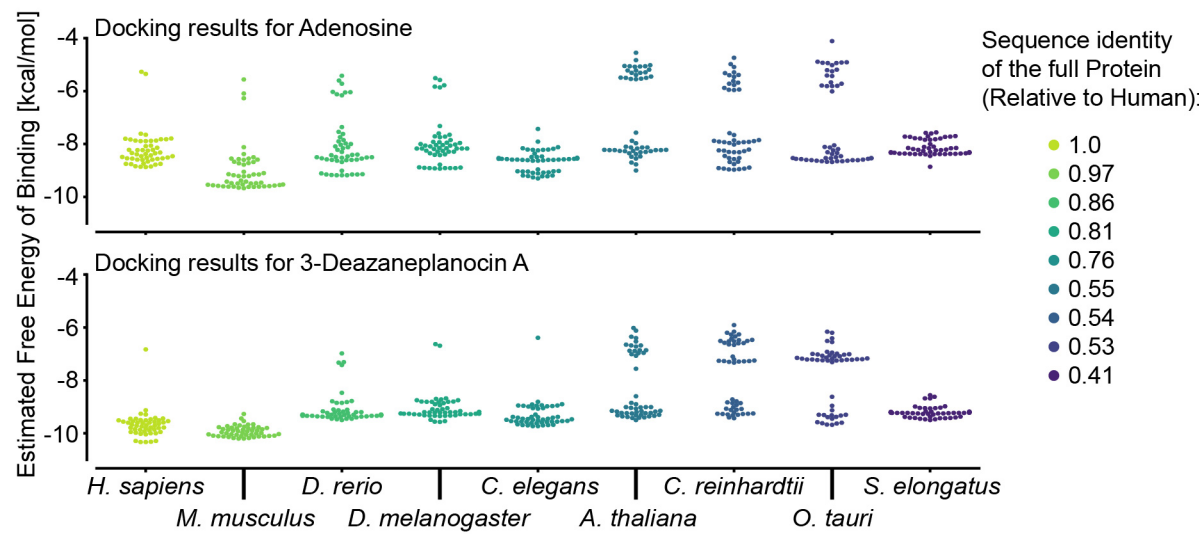

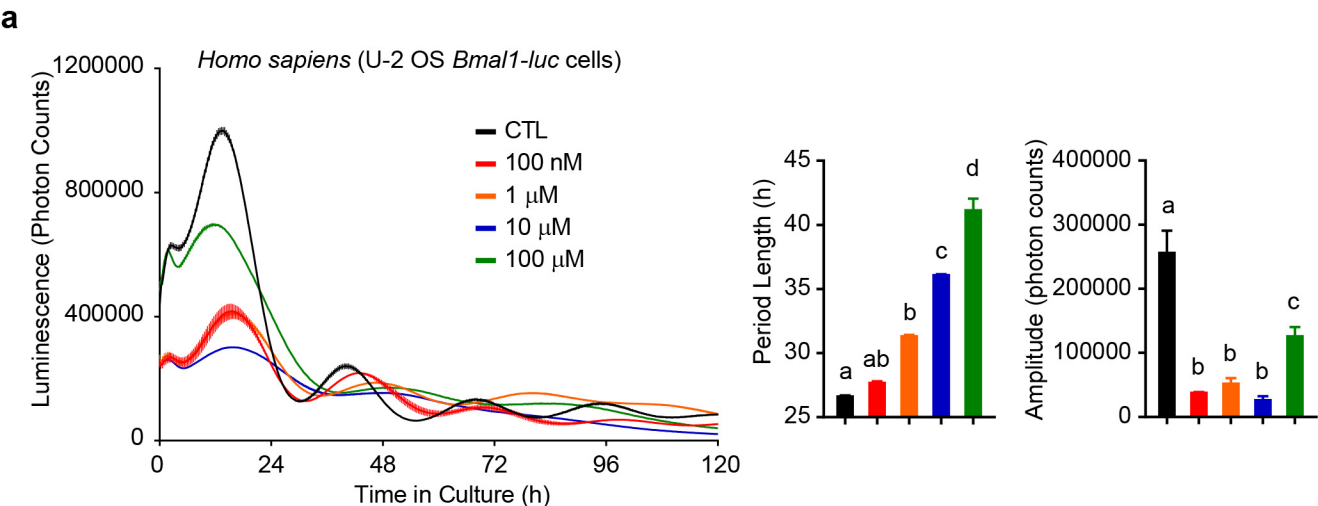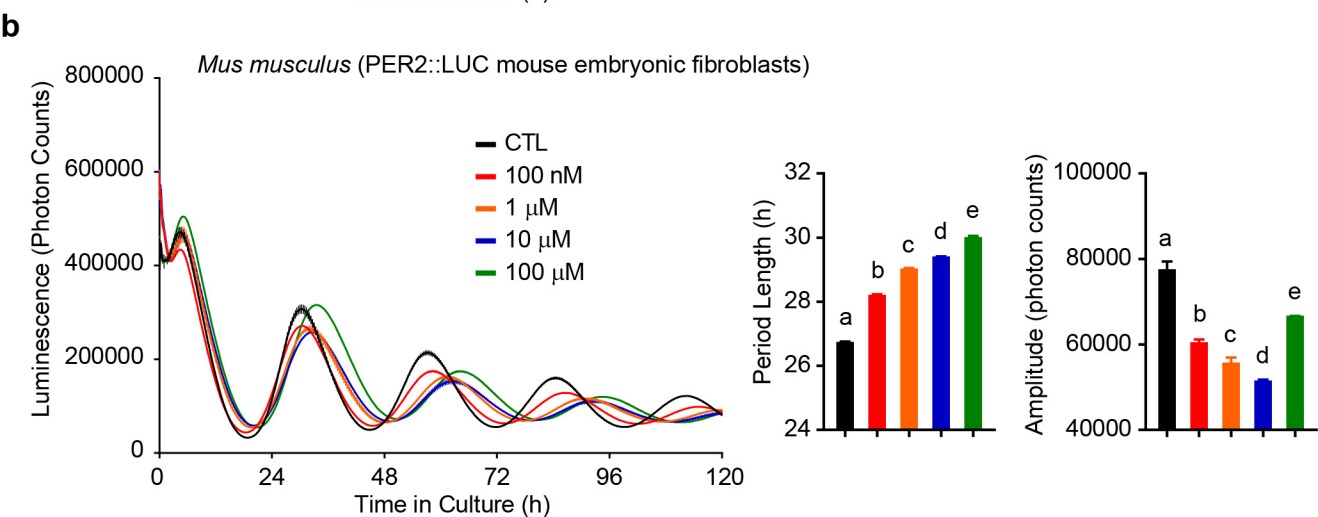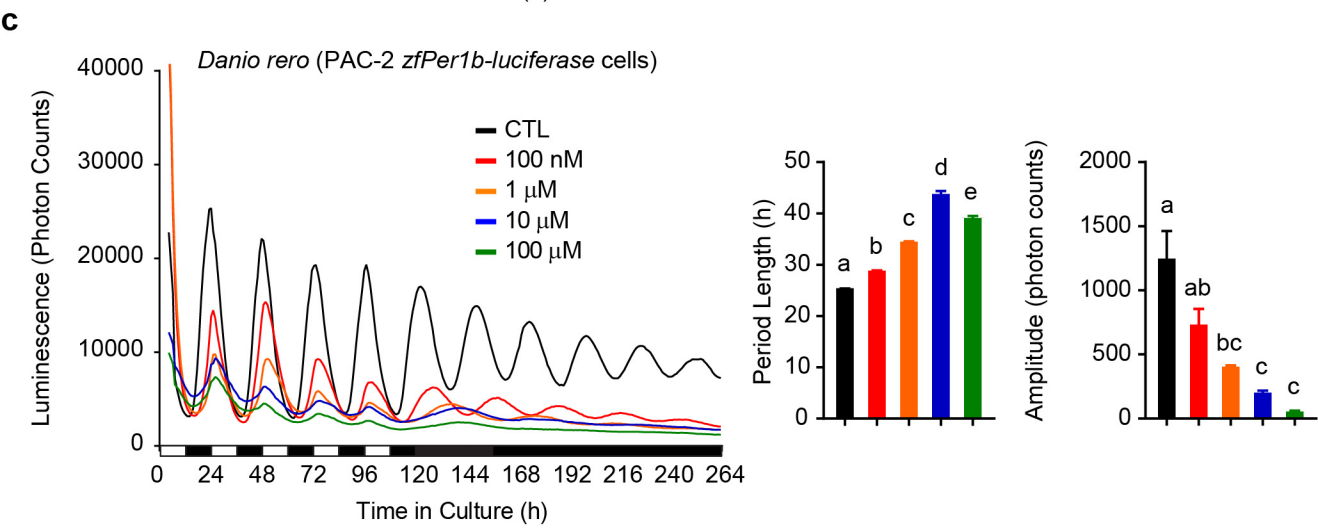

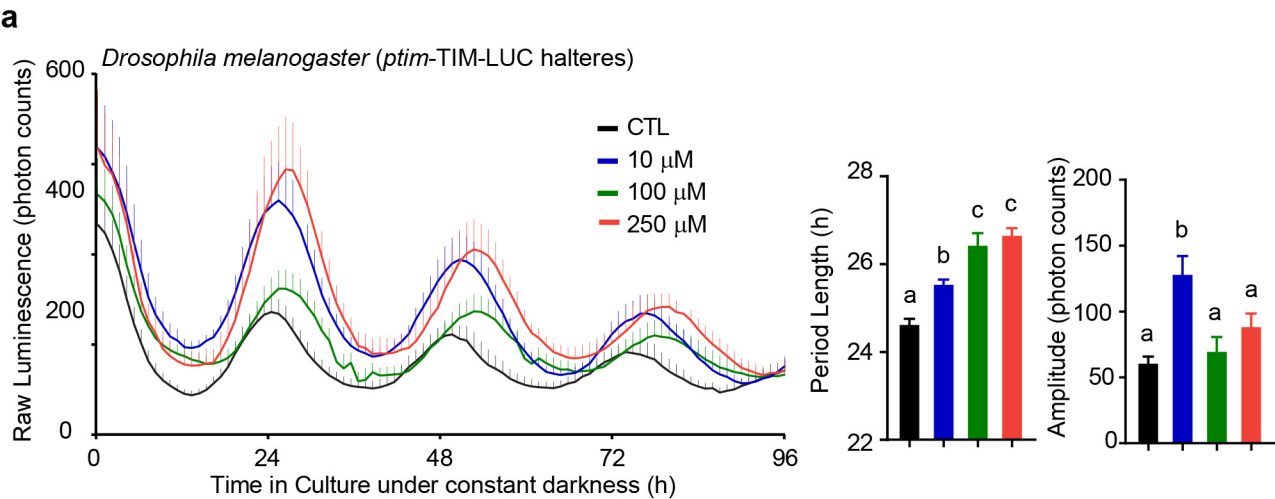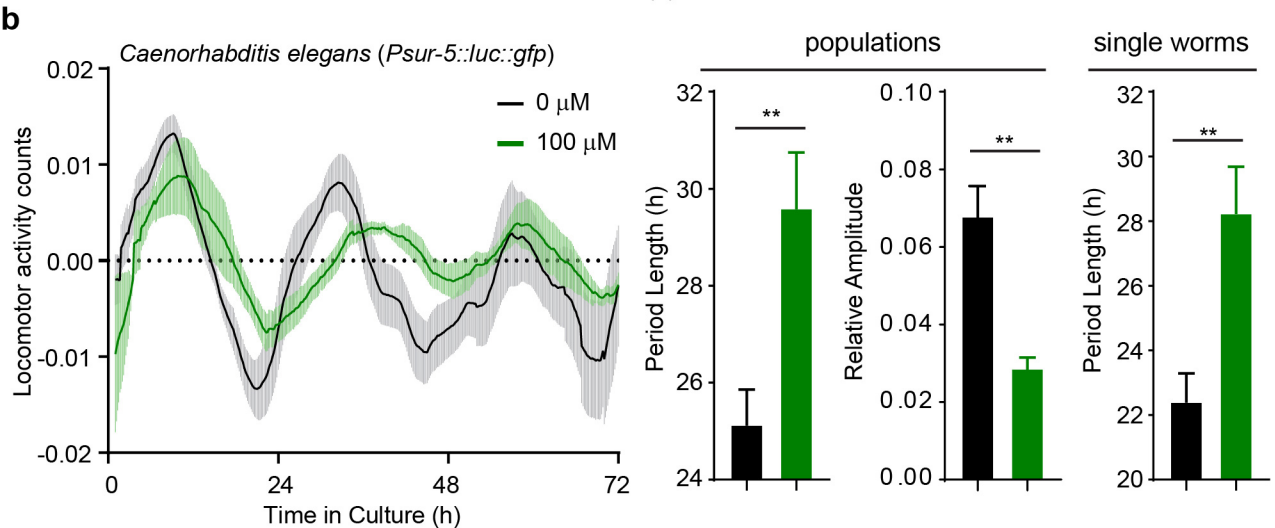



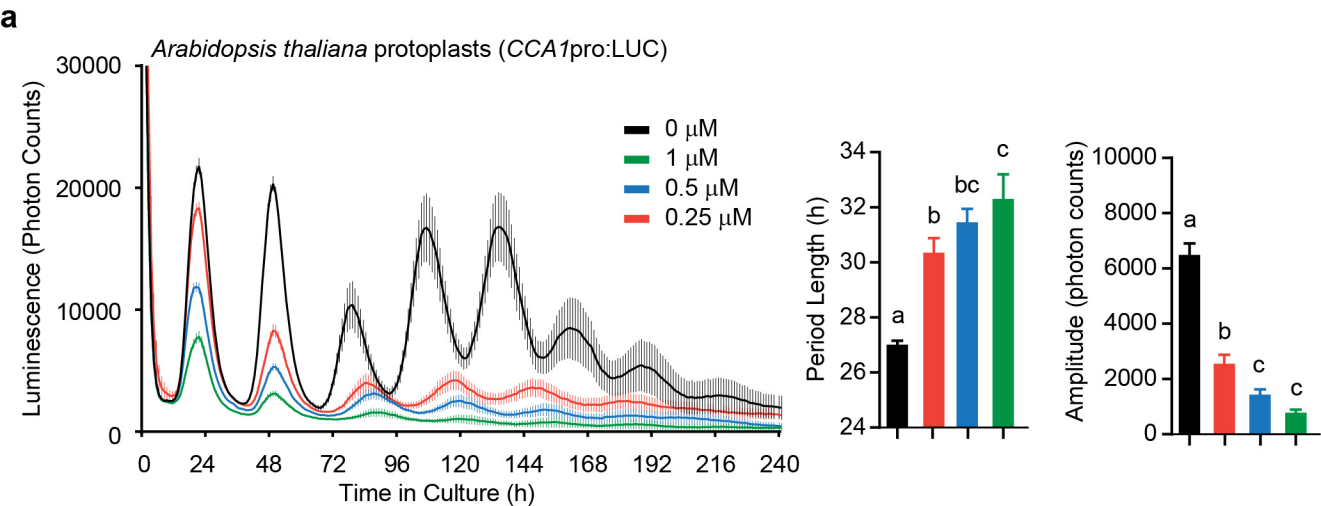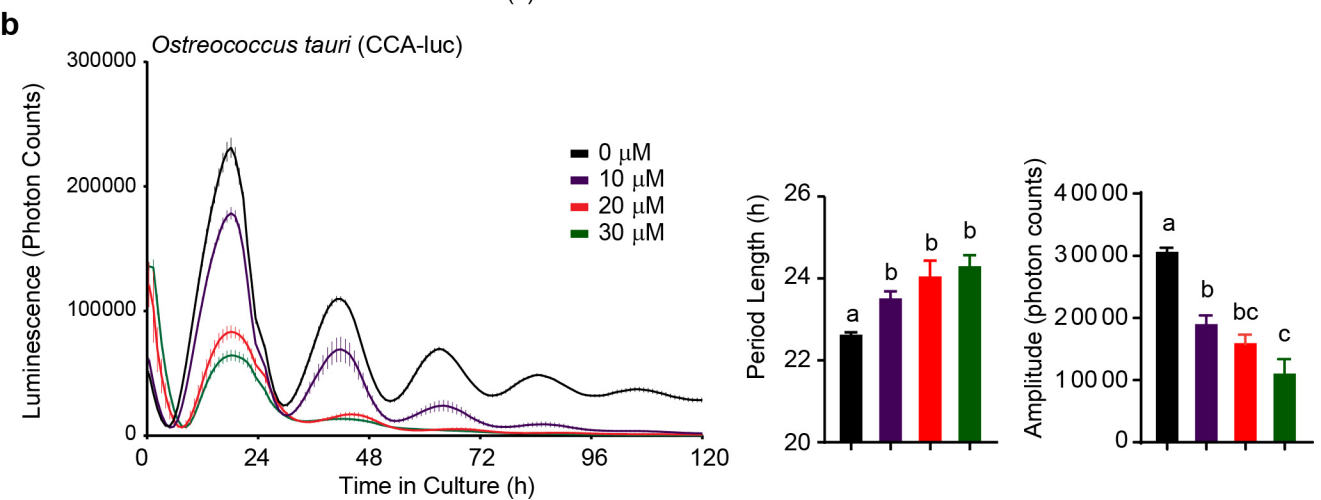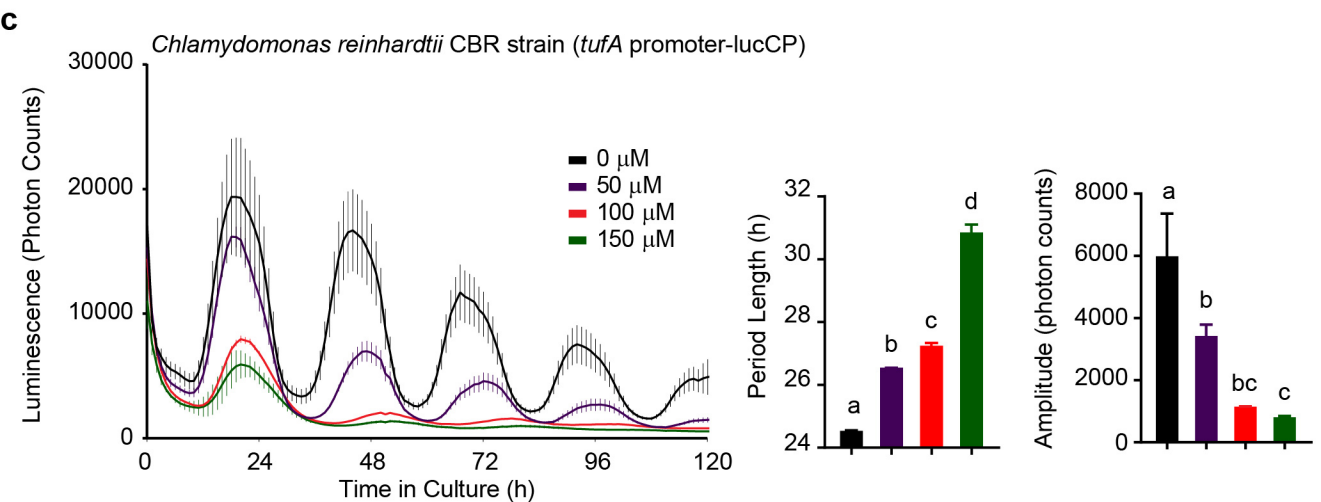



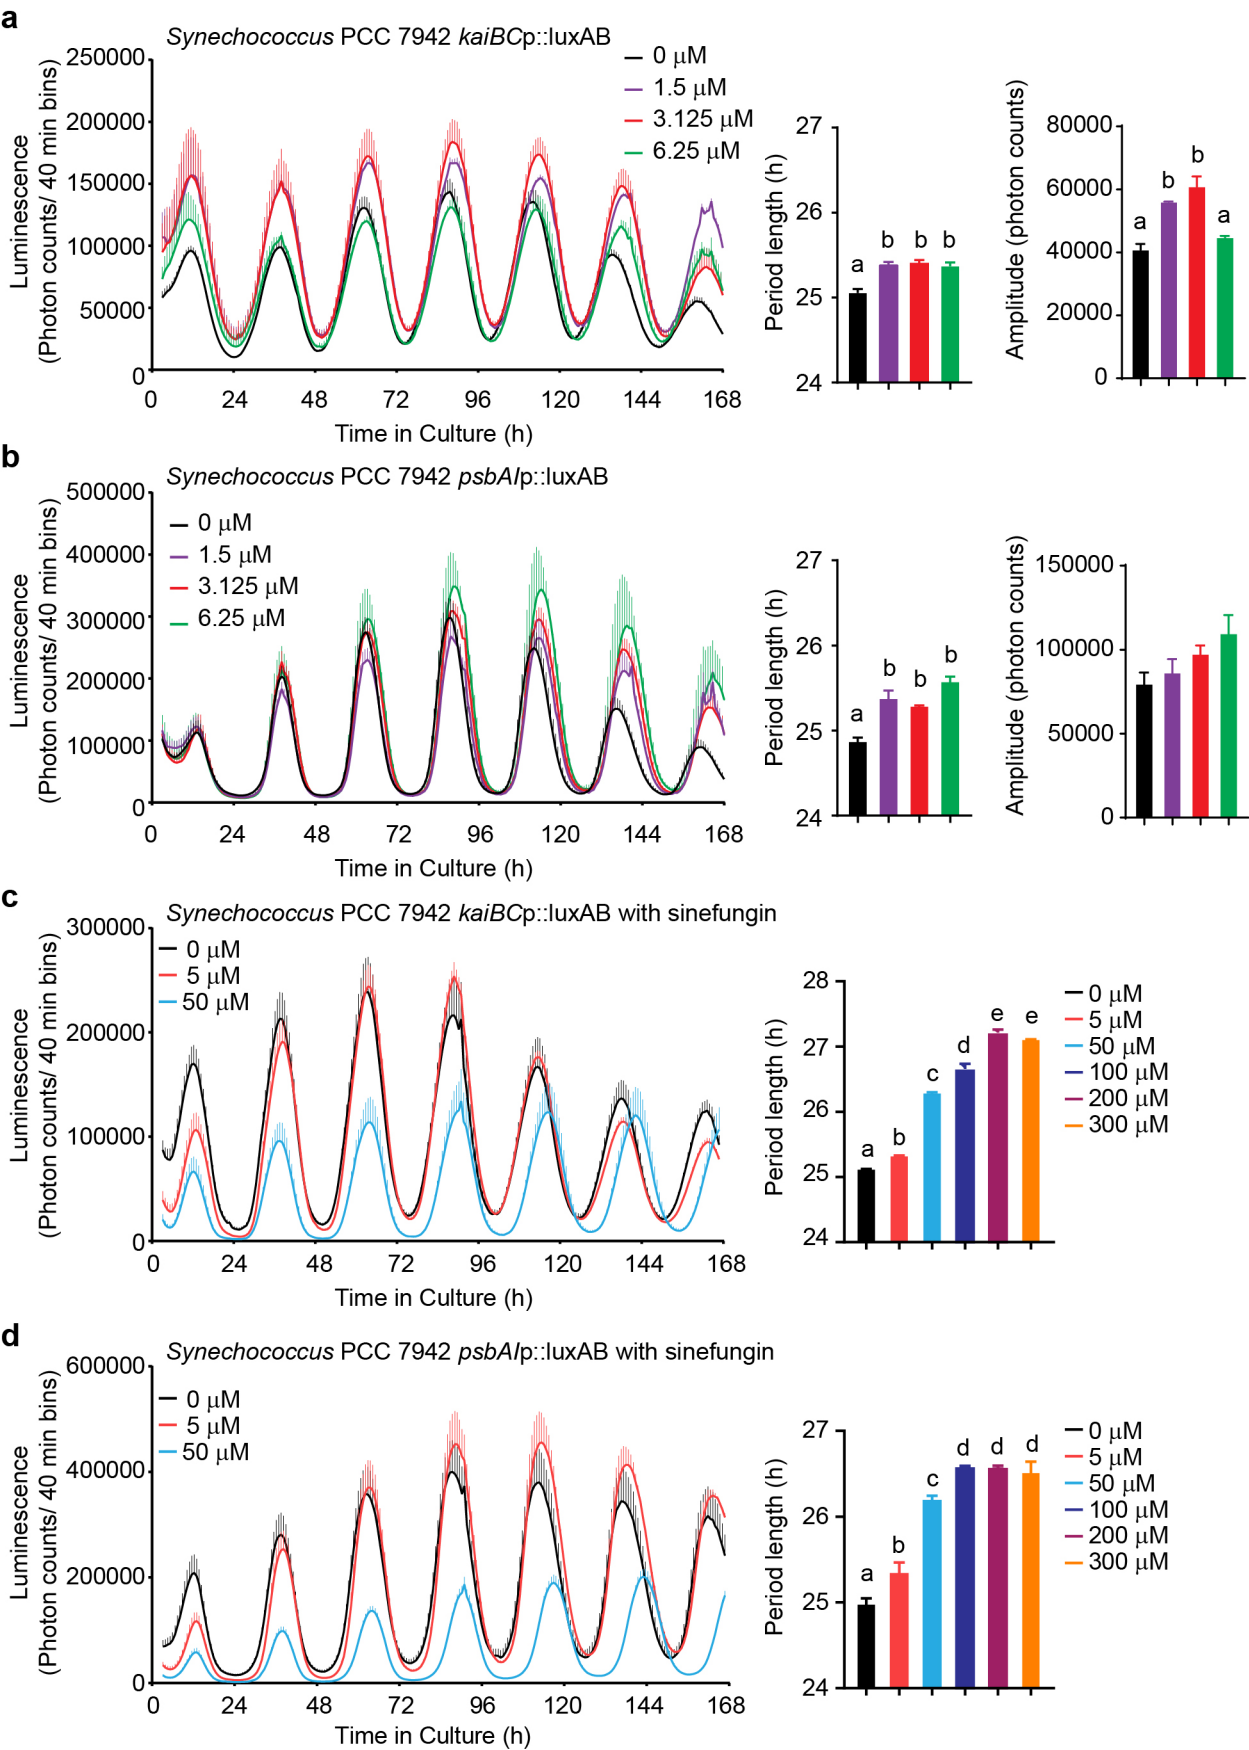

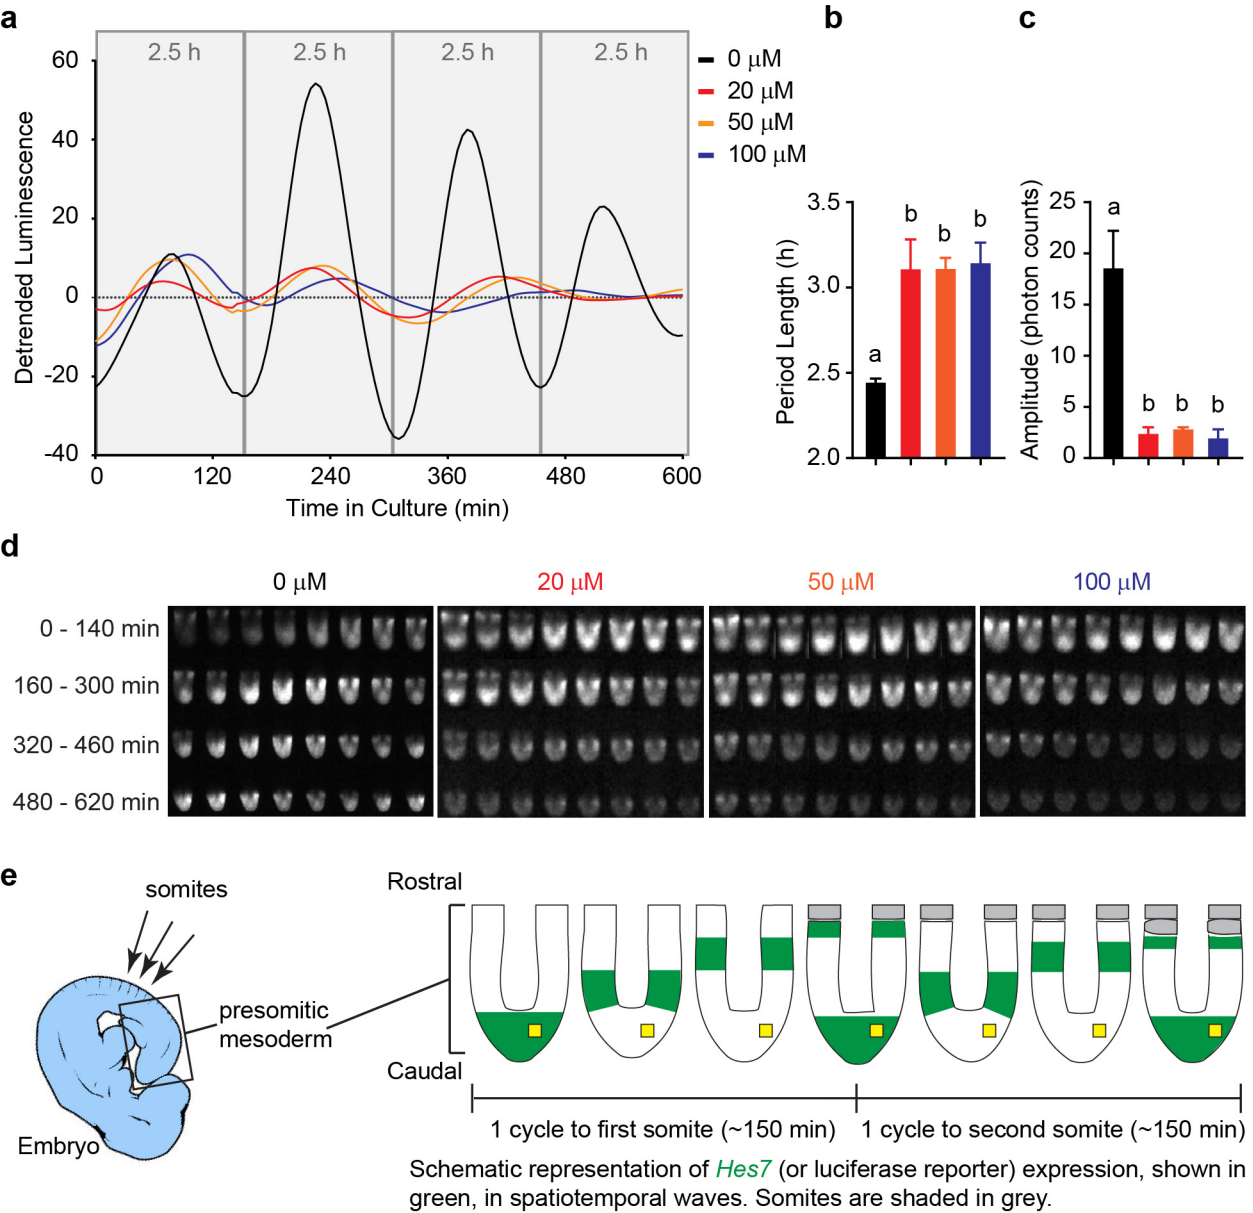

Source: https://www.biorxiv.org/content/10.1101/653667v1.full.pdf
